# Supplementary material for: ATRX Loss on the X Chromosome: A Key Chromatin Guardian with High Prognostic Impact in Melanoma
Source: Research Square preprint supplement (doi:10.21203/rs.3.rs-6718660/v1), 2025-06-27
Supplement: Supplementary file 1 [file 34aa3373f892b2f995de1e6c.xlsx]

## Sheet: Sheet 1
WGS
